# Supplementary material for: 3D reconstruction of the cerebellar germinal layer reveals tunneling connections between developing granule cells
Source: PubMed Central journal article supplement (PMC10075961; doi:10.1126/sciadv.adf3471), 2023-04-05
Supplement: sciadv.adf3471_sm.pdf [file sciadv.adf3471_sm.pdf]

Supplementary Materials for  
**3D reconstruction of the cerebellar germinal layer reveals tunneling  
connections between developing granule cells**

Diégo Cordero Cervantes *et al.*

Corresponding author: Chiara Zurzolo, chiara.zurzolo@pasteur.fr

*Sci. Adv.* **9**, eadf3471 (2023)  
DOI: 10.1126/sciadv.adf3471

**The PDF file includes:**

Figs. S1 to S7  
Legends for movies S1 and S2

**Other Supplementary Material for this manuscript includes the following:**

Movies S1 and S2

## Supplemental information titles and legends

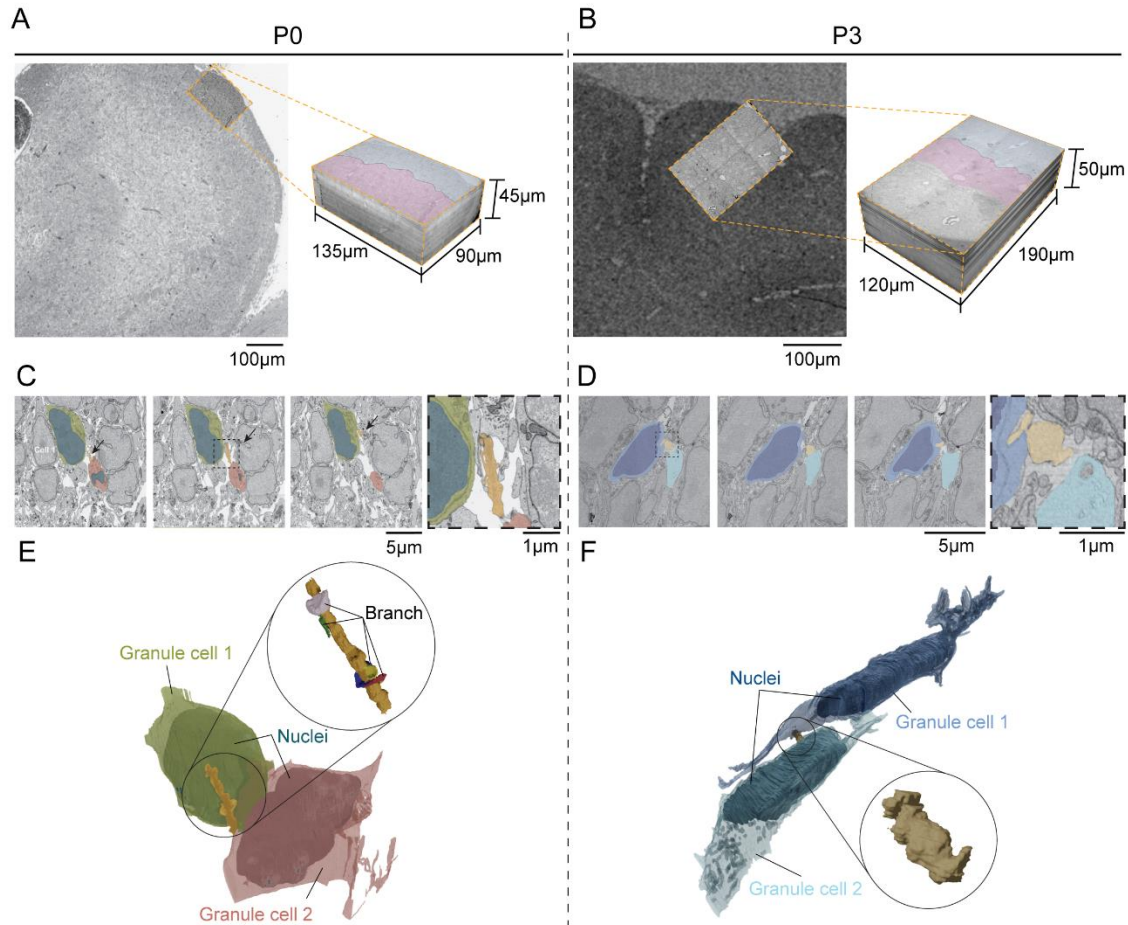

**Fig. S1. Identification of cerebellar granule cell intercellular connectivity during post-natal development of mice**

(A-B) Post-natal day 0 (A) and 3 (B) cerebellar cortex views obtained using serial sectioning scanning electron microscopy (ssSEM); electron micrographs (left) and 3D volume reconstructions (right). (C-D) Segmented electron micrographs of granule cells (GCs, various colors) and nuclei (blue) show intercellular connections (ICs, yellow, dashed box insets) bridging GCs in the external granule layer (EGL) of mice cerebella at P0 (C) and P3 (D). (E-F) 3D reconstruction of C and D, respectively, showing ICs connecting GCs; IC of E contains branches that emanate from the body of the IC.

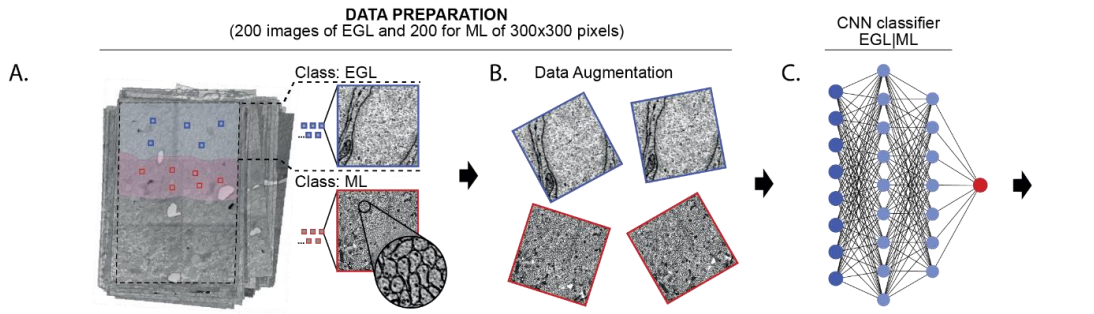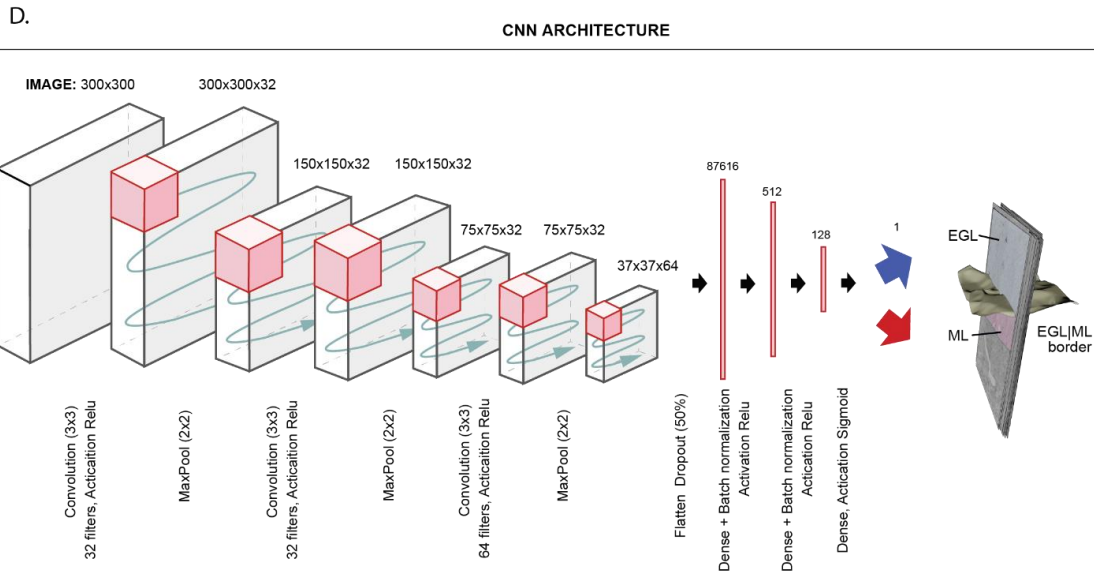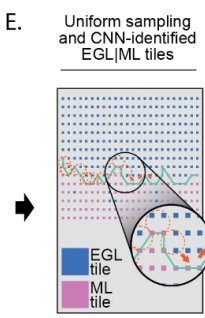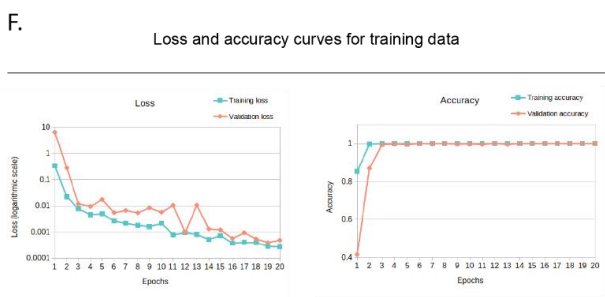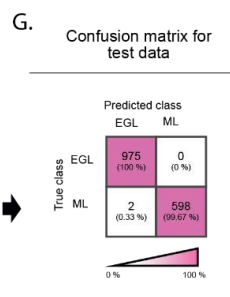

**Fig. S2. Overview of the training process of the convolutional neural network (CNN) designed to identify EGL|ML boundary (see supplementary methods for details)**

(A) Generation of training dataset: Manually chosen and labelled tiles for both EGL and ML classes from the ssSEM volume. (B) Data augmentation. (C, D) Architecture of the trained CNN classifier and the final result. (E) Predicted labels (EGL/ML) for uniformly sampled tiles allowing the segregation of the two layers. (F) Training performance of the CNN- Loss and Accuracy curves saturating at close to zero and one respectively indicating satisfactory training. (G) Testing performance of the CNN- Confusion matrix showing near-perfect identification of EGL and ML classes in the test dataset.

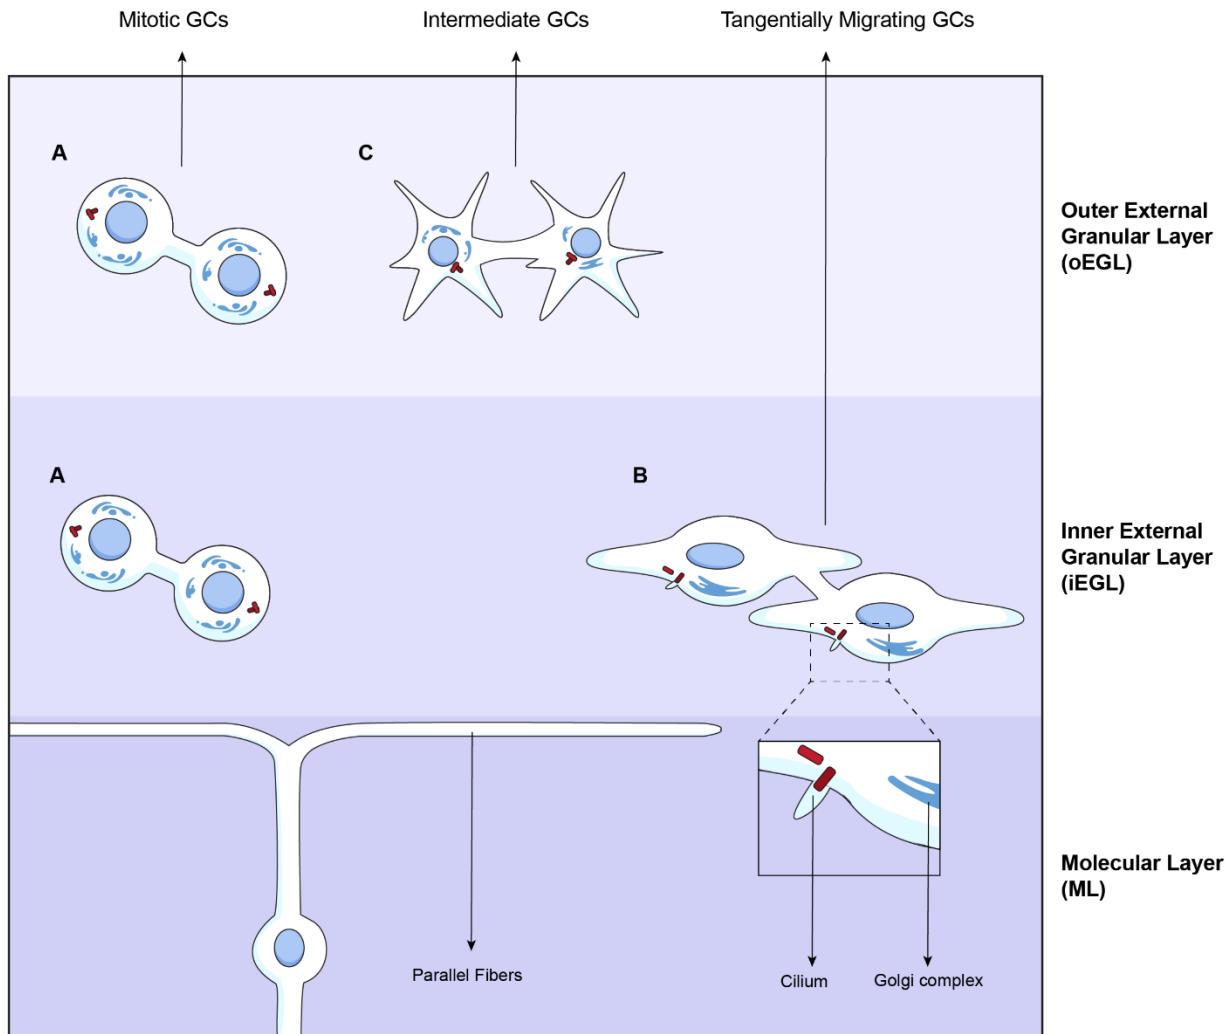

**Fig. S3. Categorization of GCs into three categories based on organelles and morphology of cells**

Connected GCs were grouped into mitotic, intermediate and migrating categories based on cell shape, number of Golgi complexes, presence of cilium, position of the centrosome in a cell and orientation of the protrusions of a cell when present (categorization provided in **Fig. 4E**). **(A)** Connected mitotic GCs were mainly present in the oEGL, but some are also localized in the iEGL. They display more than two Golgi complexes dispersed in the cell, absence of a cilium, largely spheroid shape and centrosomes positioned at opposite poles of the cells. **(B)** Connected tangentially migrating GCs are mainly localized in the iEGL. They harbor less than 2 Golgi complexes, have a cilium and show well-developed lamellipodia oriented parallel to the EGL|ML

boundary and parallel fibers. (C) Intermediate GCs were essentially observed in the oEGL. They share features of mitotic and migrating GCs. They show both filopodial and lamellipodial protrusions that are not specifically oriented in a particular direction, may have more than 2 Golgi complexes and a cilium; however, centrosomes are present in the soma, indicating non-migratory behavior.



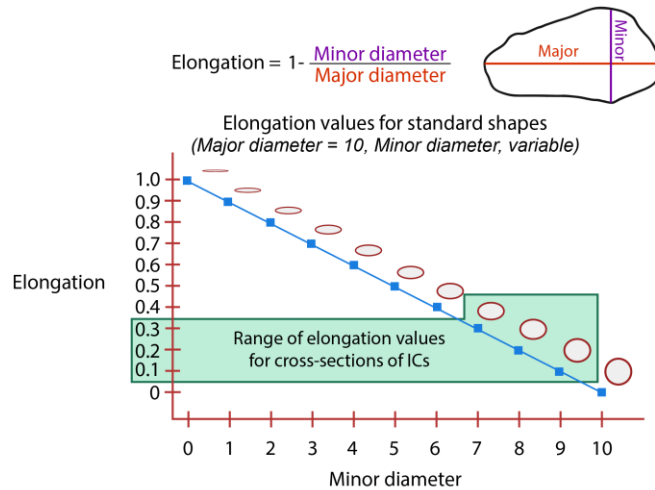

**Fig. S5. Calculation of elongation of cross-sections**

Elongation values of standard ellipses indicate that the observed cross-sections of our ICs were fairly circular, as shown by green highlighted region.

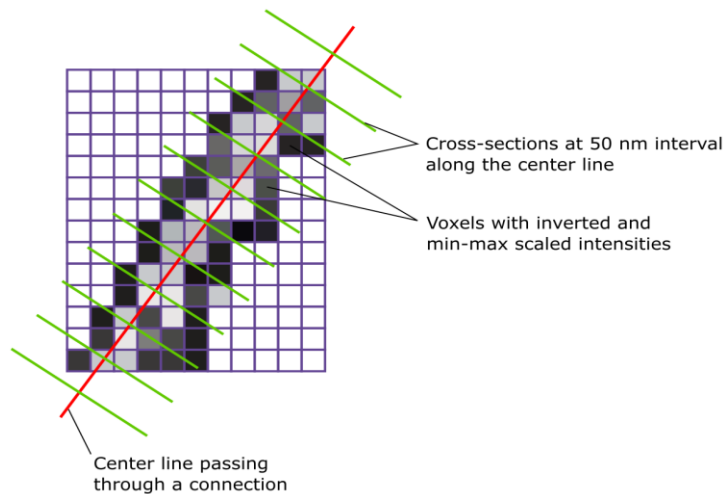

**Fig. S6. Voxel intensity analysis within ICs**

Schematic 2D representation of cross-sections (indicated by green lines) of an IC/connection (dark voxels) with respect to a center-line (red). The intensities of voxels are min-max scaled and averaged for each cross-section to obtain a voxel intensity profile along the IC that indicates the varying electron density along its length.



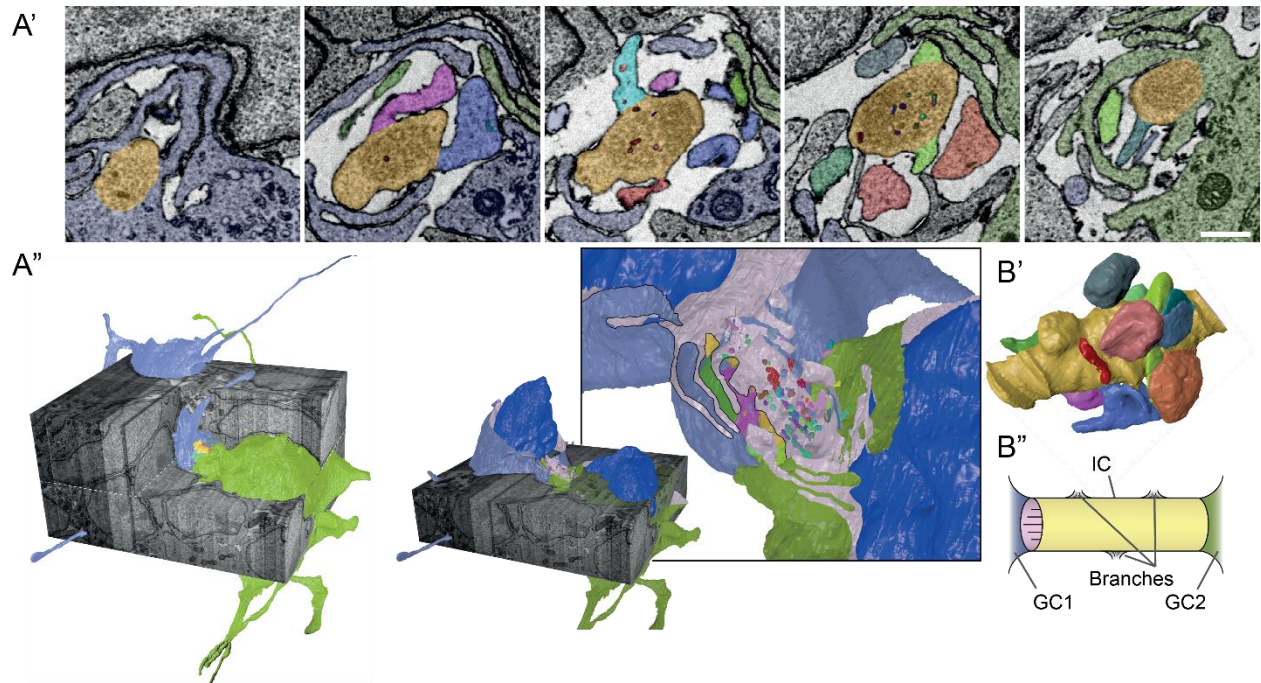

**Fig. S7. Subcellular elements associated with ICs**

(A) ssSEM micrographs (A') and 3D reconstructions (A'') showing GCs (blue and green) connected by IC (yellow) that contains numerous cargoes (vesicles, red arrow; long membranous compartments, cyan arrow, A''), and extending branch protrusions containing cargoes (magenta arrow, A'). (B) 3D reconstruction (B') and diagram (B'') of IC in A and its internal structure and contents, showing the branches that extend throughout.

**Movie S1.** 3D volume of a P7 mouse cerebellum imaged using ssSEM

**Movie S2.** GCs in EGL connected by ICs
